# Supplementary material
Source: PubMed Central journal article supplement (PMC6593636)
Supplement: jama-321-2438-s001.pdf [file jama-321-2438-s001.pdf]

## Supplementary Online Content

Bhatt SP, Balte PP, Schwartz JE, et al. Discriminative accuracy of FEV<sub>1</sub>:FVC thresholds for COPD-related hospitalization and mortality. *JAMA*. doi:10.1001/jama.2019.7233

**eTable 1.** Design Features of Cohorts Included

**eTable 2.** Baseline Characteristics, Stratified by FEV<sub>1</sub>:FVC <0.70

**eTable 3.** Reclassification of Airflow Obstruction According to Fixed FEV<sub>1</sub>:FVC Threshold

**eTable 4.** Brier Scores (95% Confidence Intervals) for the Prediction of COPD Events by Various FEV<sub>1</sub>:FVC Thresholds in Unadjusted Models

**eTable 5.** Sensitivity Analyses for the Discriminative Accuracy of Various Fixed FEV<sub>1</sub>:FVC Thresholds for COPD Event Risk in Adjusted Models

**eTable 6.** Brier Scores (95% confidence intervals) for the Prediction of COPD Events by Various FEV<sub>1</sub>:FVC Thresholds in Adjusted Models

**eFigure 1.** CONSORT

**eFigure 2.** Venn Diagram Showing the Extent of Overlap for Several Different FEV<sub>1</sub>:FVC Threshold Groups and, for Each Group, the Incidence Density Rates (IDRs) per 1000 Person-Years for COPD-Related Hospitalization and Mortality

**eFigure 3.** Calibration Plot Comparing Predicted and Observed 10-Year Risk for COPD-Related Events, by Various FEV<sub>1</sub>:FVC Stratum for Airflow Limitation, in Covariate-Adjusted Models

**eFigure 4.** Discriminative Accuracy of Various Fixed FEV<sub>1</sub>:FVC Thresholds for Airflow Obstruction With Respect to COPD-Related Hospitalization and Mortality, Stratified by Smoking Status

**eFigure 5.** Discriminative Accuracy of Various Fixed FEV<sub>1</sub>:FVC Thresholds for Airflow Obstruction With Respect to COPD-Related Hospitalization Versus COPD-Related Mortality

**eFigure 6.** Discriminative Accuracy of Various fixed FEV<sub>1</sub>:FVC Thresholds for Airflow Obstruction With Respect to COPD-Related Hospitalization and Mortality, Stratified by Sex

**eFigure 7.** Discriminative Accuracy of Various Fixed FEV<sub>1</sub>:FVC Thresholds for Airflow Obstruction With Respect to Events Classified as Primarily Caused by COPD Versus the Primary End Point

**eFigure 8.** Incremental Discriminative Accuracy of Various Fixed FEV<sub>1</sub>:FVC Thresholds for Airflow Obstruction With Respect to COPD-Related Hospitalization and Mortality, When Added to a Model Adjusted for Sociodemographic Factors and Smoking Status

**eFigure 9.** Incremental Discrimination With Sequential Covariate Adjustment to the Fixed FEV<sub>1</sub>:FVC Thresholds for Airflow Obstruction With Respect to COPD-Related Hospitalization and Mortality

This supplementary material has been provided by the authors to give readers additional information about their work.

**eTable 1. Design features of cohorts included**

| Cohort |                                           | Sites                     | Enrollment year      | Major eligibility criteria                                                                       | Self-reported fixed categories for race or race/ethnicity              |
|--------|-------------------------------------------|---------------------------|----------------------|--------------------------------------------------------------------------------------------------|------------------------------------------------------------------------|
| ARIC   | Atherosclerosis Risk in Communities Study | Winston-Salem, NC         | 1987-89              | Age 45 -64 years                                                                                 | White<br>Black<br>Asian/Pacific Islanders<br>American Indian           |
|        |                                           | Jackson, MS               |                      |                                                                                                  |                                                                        |
|        |                                           | Minneapolis, MN           |                      |                                                                                                  |                                                                        |
|        |                                           | Washington County, MD     |                      |                                                                                                  |                                                                        |
| CHS    | Cardiovascular Health Study               | Pittsburgh, PA            | 1989-90              | Age 65 + years                                                                                   | White<br>Black<br>Asian/Pacific Islanders<br>American Indian<br>Others |
|        |                                           | Winston-Salem, NC         |                      |                                                                                                  |                                                                        |
|        |                                           | Sacramento, CA            |                      |                                                                                                  |                                                                        |
|        |                                           | Baltimore, MD             |                      |                                                                                                  |                                                                        |
| HABC   | Health, Aging and Body Composition study  | Pittsburgh, PA            | 1997-98              | Age 70-79 years<br>Participants required to have no major disabilities or functional limitations | White<br>Black<br>Asian/Pacific Islanders<br>Hispanic/Latino           |
|        |                                           | Memphis, TN               |                      |                                                                                                  |                                                                        |
|        |                                           | San Francisco, CA         |                      |                                                                                                  |                                                                        |
| MESA   | Multi-Ethnic Study of Atherosclerosis     | Winston-Salem, NC         | 2000-02 <sup>a</sup> | Age 45-84 years<br>Participants required to be free of clinical cardiovascular disease.          | White<br>Black<br>Asian/Pacific Islanders<br>Hispanic/Latino           |
|        |                                           | Upper Manhattan/Bronx, NY |                      |                                                                                                  |                                                                        |
|        |                                           | Los Angeles, CA           |                      |                                                                                                  |                                                                        |
|        |                                           | Baltimore, MD             |                      |                                                                                                  |                                                                        |
|        |                                           | Chicago, IL               |                      |                                                                                                  |                                                                        |
|        |                                           | Minneapolis, MN           |                      |                                                                                                  |                                                                        |

<sup>a</sup> In MESA, first spirometry measurements were conducted in 2004-06, hence 2004-06 was treated as the baseline for analyses in MESA in this report.

**eTable 2. Baseline characteristics, stratified by FEV<sub>1</sub>/FVC <0.70.**

|                                                   | FEV <sub>1</sub> /FVC < 0.70 | FEV <sub>1</sub> /FVC ≥ 0.70 | Total             |
|---------------------------------------------------|------------------------------|------------------------------|-------------------|
| Total sample, n (%)                               | 6,261                        | 17,946                       | 24,207            |
| Total events follow-up, person-years              | 72,211                       | 267,546                      | 340,757           |
| Cohort, n (%)                                     |                              |                              |                   |
| ARIC                                              | 2,885 (22.5)                 | 9,923 (77.5)                 | 12,808 (52.9)     |
| CHS                                               | 1,896 (39.4)                 | 2,918 (60.6)                 | 4,814 (19.9)      |
| Health ABC                                        | 617 (23.9)                   | 1,961 (76.1)                 | 2,578 (10.7)      |
| MESA                                              | 863 (21.5)                   | 3,144 (78.5)                 | 4,007 (16.6)      |
| Age, years                                        | 65.9 (10.1)                  | 61.7 (10.3)                  | 62.8 (10.5)       |
| Age group, n (%)                                  |                              |                              |                   |
| 45-55 years                                       | 1,021 (15.0)                 | 5,767 (85.0)                 | 6,788 (28.0)      |
| 56-65 years                                       | 2,058 (26.3)                 | 5,769 (73.7)                 | 7,827 (32.3)      |
| 66-75 years                                       | 1,896 (30.8)                 | 4,262 (69.2)                 | 6,158 (25.4)      |
| >75 years                                         | 1,286 (37.5)                 | 2,148 (62.6)                 | 3,434 (14.2)      |
| Sex, n (%)                                        |                              |                              |                   |
| Female                                            | 2,692 (20.7)                 | 10,298 (79.3)                | 12,990 (53.7)     |
| Male                                              | 3,569 (31.8)                 | 7,648 (68.2)                 | 11,217 (46.3)     |
| Median Body mass index (IQR), kg/m <sup>2</sup>   | 25.6 (22.9, 28.6)            | 27.3 (24.5, 30.8)            | 26.8 (24.0, 30.3) |
| Race/ethnicity, n (%) <sup>a</sup>                |                              |                              |                   |
| Non-Hispanic White                                | 4,839 (28.8)                 | 11,955 (71.2)                | 16,794 (69.4)     |
| Non-Hispanic Black                                | 1,186 (20.1)                 | 4,714 (79.9)                 | 5,900 (24.4)      |
| Hispanic/Latino                                   | 115 (13.5)                   | 739 (86.5)                   | 854 (3.5)         |
| Asian                                             | 111 (17.8)                   | 512 (82.2)                   | 623 (2.6)         |
| Other                                             | 10 (27.8)                    | 26 (72.2)                    | 36 (0.2)          |
| Education status, n (%)                           |                              |                              |                   |
| Less than high school                             | 909 (29.1)                   | 2,215 (70.9)                 | 3,124 (12.9)      |
| High school                                       | 1,676 (25.2)                 | 4,988 (74.9)                 | 6,663 (27.5)      |
| Some college                                      | 762 (23.6)                   | 2,464 (76.4)                 | 3,226 (13.3)      |
| College or more                                   | 2,908 (26.0)                 | 8,263 (74.0)                 | 11,172 (46.2)     |
| Lifetime smoking status, n (%)                    |                              |                              |                   |
| Never                                             | 1,331 (14.8)                 | 7,695 (85.3)                 | 9,026 (37.3)      |
| Ever                                              | 4,930 (32.5)                 | 10,251 (67.5)                | 15,181 (62.7)     |
| Median pack-years (q1, q3) in ever-smokers, years | 34.5 (17.0, 51.0)            | 17.0 (4.4, 33.9)             | 22.3 (6.8, 40.5)  |
| Medical history, n (%)                            |                              |                              |                   |
| Hypertension <sup>b</sup>                         | 3,553 (26.7)                 | 9,750 (73.3)                 | 13,303 (55.0)     |
| Diabetes mellitus <sup>c</sup>                    | 738 (21.7)                   | 2,666 (78.3)                 | 3,404 (14.1)      |
| Chronic obstructive pulmonary disease             | 953 (47.0)                   | 1,074 (53.0)                 | 2,027 (8.4)       |
| Coronary artery disease                           | 678 (37.6)                   | 1,125 (62.4)                 | 1,803 (7.5)       |
| Asthma                                            | 657 (49.3)                   | 693 (50.7)                   | 1,368 (5.7)       |
| Lung function                                     |                              |                              |                   |
| Baseline FEV <sub>1</sub> percent-predicted, %    | 76.4 (19.8)                  | 97.9 (15.4)                  | 92.4 (19.2)       |
| Baseline FEV <sub>1</sub> , L                     | 2.1 (0.8)                    | 2.6 (0.8)                    | 2.5 (0.8)         |

|                                |             |             |             |
|--------------------------------|-------------|-------------|-------------|
| Baseline FVC, L                | 3.4 (1.1)   | 3.4 (1.0)   | 3.4 (1.0)   |
| Baseline FEV <sub>1</sub> /FVC | 0.62 (0.08) | 0.77 (0.05) | 0.73 (0.09) |

ARIC = Atherosclerosis Risk in Communities Study; CHS = Cardiovascular Health Study; FEV<sub>1</sub> = forced expiratory volume in one second; FVC = forced vital capacity; HABC = Health Aging and Body Composition; IQR = Interquartile range; MESA = Multi-Ethnic Study of Atherosclerosis.

Categorical data presented as number (%). Continuous data presented as mean (standard deviation [SD]) or, if non-normally distributed, as median (interquartile range [IQR]).

<sup>a</sup>Race was self-reported according to fixed, mutually exclusive categories, which differed by cohort. In ARIC, participants self-reported race as non-Hispanic White, non-Hispanic Black, Asian-Pacific Islander, or American Indian. In CHS, participants self-reported race as non-Hispanic White, non-Hispanic Black, Asian-Pacific Islander, American Indian, or Other. In Health ABC and MESA, race/ethnicity was self-reported as non-Hispanic White, non-Hispanic Black, Hispanic, or Asian. No separate question regarding ethnicity was administered at enrollment for any of the cohorts.

<sup>b</sup>Self-reported hypertension or systolic blood pressure  $\geq$  140 mmHg or diastolic blood pressure  $\geq$  90 mmHg or use of anti-hypertensive medications

<sup>c</sup>Self-reported diabetes or fasting blood sugar levels  $\geq$  126 mg/dl or use of oral hypoglycemic agents or insulin.

**eTable 3. Reclassification of airflow obstruction according to fixed FEV<sub>1</sub>/FVC threshold**

| Fixed Ratio Threshold | < Fixed Ratio Threshold |              |               | ≥ Fixed ratio threshold |
|-----------------------|-------------------------|--------------|---------------|-------------------------|
|                       | Total                   | <LLN         | ≥ LLN         | < LLN                   |
| 0.60                  | 1,646 (6.8)             | 1,642 (99.8) | 4 (0.2)       | 2,004 (8.3)             |
| 0.61                  | 1,847 (7.6)             | 1,831 (99.1) | 16 (0.9)      | 1,815 (7.5)             |
| 0.62                  | 2,090 (8.6)             | 2,061 (98.6) | 29 (1.4)      | 1,585 (6.6)             |
| 0.63                  | 2,358 (9.7)             | 2,287 (97.0) | 71 (3.0)      | 1,359 (5.6)             |
| 0.64                  | 2,711 (11.2)            | 2,544 (93.8) | 167 (6.2)     | 1,102 (4.6)             |
| 0.65                  | 3,130 (12.9)            | 2,824 (90.2) | 306 (9.8)     | 822 (3.4)               |
| 0.66                  | 3,576 (14.8)            | 3,036 (84.9) | 540 (15.1)    | 610 (2.5)               |
| 0.67                  | 4,103 (17.0)            | 3,243 (79.0) | 860 (21.0)    | 403 (1.7)               |
| 0.68                  | 4,728 (19.5)            | 3,427 (72.5) | 1,301 (27.5)  | 219 (0.9)               |
| 0.69                  | 5,466 (22.6)            | 3,556 (65.1) | 1,910 (34.9)  | 90 (0.4)                |
| 0.70                  | 6,261 (25.9)            | 3,627 (57.9) | 2,634 (42.1)  | 19 (0.1)                |
| 0.71                  | 7,180 (29.7)            | 3,643 (50.7) | 3,537 (49.3)  | 3 (0.01)                |
| 0.72                  | 8,179 (33.8)            | 3,645 (44.6) | 4,534 (55.4)  | 1 (0)                   |
| 0.73                  | 9,291 (38.4)            | 3,646 (39.2) | 5,645 (60.8)  | 0 (0)                   |
| 0.74                  | 10,555 (43.6)           | 3,646 (34.5) | 6,909 (65.5)  | 0 (0)                   |
| 0.75                  | 11,839 (48.9)           | 3,646 (30.8) | 8,193 (69.2)  | 0 (0)                   |
| 0.76                  | 13,191 (54.5)           | 3,646 (27.6) | 9,545 (72.4)  | 0 (0)                   |
| 0.77                  | 14,622 (60.4)           | 3,646 (24.9) | 10,976 (75.1) | 0 (0)                   |
| 0.78                  | 16,035 (66.2)           | 3,646 (22.7) | 12,389 (77.3) | 0 (0)                   |
| 0.79                  | 17,456 (72.1)           | 3,645 (20.9) | 13,810 (79.1) | 0 (0)                   |
| 0.80                  | 18,779 (77.6)           | 3,646 (19.4) | 15,133 (80.6) | 0 (0)                   |
| LLN                   | 3,646 (15.1)            |              |               |                         |

LLN = Lower limit of normal per Global Lung Function Initiative reference equations.

**eTable 4. Brier Scores (95% confidence intervals) for the prediction of COPD events by various FEV<sub>1</sub>/FVC thresholds in unadjusted models.**

| Model                                                                 | At Risk / Events<br>(IDR) | Optimal fixed ratio<br>threshold <sup>a</sup> | Brier Scores                 |                              |                              |
|-----------------------------------------------------------------------|---------------------------|-----------------------------------------------|------------------------------|------------------------------|------------------------------|
|                                                                       |                           |                                               | B <sub>OPT</sub><br>(95% CI) | B <sub>0.7</sub><br>(95% CI) | B <sub>LLN</sub><br>(95% CI) |
| <b>Primary analyses</b>                                               | 24,207 / 3,925<br>(11.54) | 0.71                                          | 0.150<br>(0.144, 0.156)      | 0.150<br>(0.144, 0.156)      | 0.148<br>(0.142, 0.154)      |
| <b>Subgroup analyses</b>                                              |                           |                                               |                              |                              |                              |
| Ever smoker                                                           | 15,181/ 3,389<br>(16.34)  | 0.70                                          | 0.197<br>(0.189, 0.206)      | n/a <sup>b</sup>             | 0.195<br>(0.187, 0.204)      |
| Never smoker                                                          | 9,026/ 536<br>(4.04)      | 0.74                                          | 0.059<br>(0.052, 0.066)      | 0.059<br>(0.052, 0.066)      | 0.059<br>(0.052, 0.066)      |
| Men                                                                   | 11,217/ 2,123<br>(14.27)  | 0.70                                          | 0.171<br>(0.162, 0.181)      | n/a <sup>b</sup>             | 0.168<br>(0.159, 0.178)      |
| Women                                                                 | 12,990/ 1,802<br>(9.42)   | 0.71                                          | 0.131<br>(0.123, 0.139)      | 0.130<br>(0.123, 0.138)      | 0.130<br>(122, 0.138)        |
| <b>Alternative event definitions</b>                                  |                           |                                               |                              |                              |                              |
| COPD-related hospitalization                                          | 24,207/ 3,563<br>(10.47)  | 0.71                                          | 0.150<br>(0.144, 0.155)      | 0.149<br>(0.143, 0.155)      | 0.148<br>(0.142, 0.154)      |
| COPD-related mortality                                                | 24,207/ 447<br>(1.31)     | 0.68                                          | 0.152<br>(0.147, 0.157)      | 0.152<br>(0.148, 0.157)      | 0.152<br>(0.147, 0.157)      |
| Hospitalization or mortality with COPD<br>as primary/underlying cause | 24,207/ 1,129<br>(3.16)   | 0.69                                          | 0.045<br>(0.042, 0.049)      | 0.045<br>(0.042, 0.049)      | 0.045<br>(0.041, 0.049)      |
| <b>Adjusted for covariates<sup>c</sup></b>                            | 24,012 / 3,793<br>(11.16) | 0.70                                          | 0.149<br>(0.143, 0.155)      | n/a <sup>b</sup>             | 0.147<br>(0.141, 0.153)      |

B<sub>OPT</sub> = Brier Score for the optimal fixed threshold; B<sub>0.7</sub> = Brier Score for the model using a fixed ratio threshold of 0.70; B<sub>LLN</sub> = Brier Score for the model using the LLN ratio threshold; IDR = Incidence Density Rate per 1,000 person-years of follow-up; LLN = Lower limit of normal per Global Lung Function Initiative reference equations; n/a = not applicable.

Cox proportional hazards models were used. The primary outcome was defined as first hospitalization or death adjudicated as primarily or secondarily attributable to COPD or, if adjudication was lacking, those with COPD listed in any diagnosis field. In sensitivity analyses, the primary outcome was decomposed into COPD-related hospitalizations and COPD-related mortality. As another sensitivity analysis, the endpoint was restricted to incident hospitalizations and mortality adjudicated or coded as having COPD as the primary/underlying cause.

<sup>a</sup>The optimal fixed threshold was defined as the one that generated the highest Harrell's c-statistic.

<sup>b</sup>The optimal fixed threshold was 0.70, hence B<sub>OPT</sub> = B<sub>0.7</sub>.

Each fixed-threshold definition for airflow obstruction was added separately to a base model adjusted for age at enrollment, sex, race, height, birth-year, site and cohort.

**eTable 5. Sensitivity analyses for the discriminative accuracy of various fixed FEV<sub>1</sub>/FVC thresholds for COPD event risk in adjusted models.**

| Model                                                              | At Risk / Events (IDR) | Optimal fixed ratio threshold <sup>a</sup> | Harrell's C-statistics    |                           |                           | C-statistic Comparisons           |                                   |
|--------------------------------------------------------------------|------------------------|--------------------------------------------|---------------------------|---------------------------|---------------------------|-----------------------------------|-----------------------------------|
|                                                                    |                        |                                            | C <sub>OPT</sub> (95% CI) | C <sub>0.7</sub> (95% CI) | C <sub>LLN</sub> (95% CI) | ΔC <sub>OPT vs 0.7</sub> (95% CI) | ΔC <sub>OPT vs LLN</sub> (95% CI) |
| <b>Subgroup analyses</b>                                           |                        |                                            |                           |                           |                           |                                   |                                   |
| Never smoker                                                       | 8,989 / 523 (3.95)     | 0.70                                       | 0.785 (0.765, 0.805)      | n/a <sup>d</sup>          | 0.780 (0.760, 0.800)      | n/a <sup>d</sup>                  | 0.005 (-0.001, 0.010)             |
| Ever smoker                                                        | 15,023 / 3,270 (15.76) | 0.67 <sup>c</sup>                          | 0.748 (0.740, 0.757)      | 0.745 (0.736, 0.753)      | 0.750 (0.742, 0.759)      | 0.003 (-0.001, 0.008)             | -0.002 (-0.006, 0.002)            |
| Men                                                                | 11,114 / 2,048 (13.78) | 0.66 <sup>c</sup>                          | 0.760 (0.749, 0.771)      | 0.756 (0.745, 0.766)      | 0.763 (0.752, 0.774)      | 0.004 (-0.002, 0.010)             | -0.003 (-0.008, 0.001)            |
| Women                                                              | 12,898 / 1,745 (9.13)  | 0.70                                       | 0.753 (0.741, 0.765)      | n/a <sup>d</sup>          | 0.750 (0.738, 0.763)      | n/a <sup>d</sup>                  | 0.003 (-0.003, 0.008)             |
| <b>Alternative event definitions</b>                               |                        |                                            |                           |                           |                           |                                   |                                   |
| COPD-related hospitalization                                       | 24,012 / 3,740 (11.00) | 0.70                                       | 0.761 (0.753, 0.769)      | n/a <sup>d</sup>          | 0.763 (0.756, 0.771)      | n/a <sup>d</sup>                  | -0.002 (-0.006, 0.002)            |
| COPD-related mortality                                             | 24,012 / 425 (1.18)    | 0.66                                       | 0.889 (0.874, 0.904)      | 0.877 (0.863, 0.891)      | 0.894 (0.880, 0.908)      | 0.012 (0.003, 0.021)              | -0.005 (-0.012, 0.002)            |
| Hospitalization or mortality with COPD as primary/underlying cause | 24,012 / 1,114 (3.12)  | 0.67 <sup>c</sup>                          | 0.828 (0.816, 0.841)      | 0.822 (0.810, 0.834)      | 0.835 (0.822, 0.847)      | 0.006 (-0.001, 0.013)             | -0.006 (-0.012, -0.001)           |

C<sub>OPT</sub> = C-statistic for the optimal fixed threshold (equivalent to the highest c-statistic obtained among all possible fixed threshold models); C<sub>0.7</sub> = c-statistic for the model using a fixed ratio threshold of 0.70; C<sub>LLN</sub> = c-statistic for the model using the LLN ratio threshold; ΔC<sub>OPT vs 0.7</sub> = difference in C-statistics from model using optimal ratio threshold versus model using 0.70 threshold; ΔC<sub>OPT vs LLN</sub> = difference in C-statistics from model using optimal ratio threshold versus model using LLN threshold; IDR = Incidence Density Rate per 1,000 person-years of follow-up; LLN = Lower limit of normal per Global Lung Function Initiative reference equations; n/a = not applicable.

Cox proportional hazards models were used. The primary outcome was defined as first hospitalization or death adjudicated as primarily or secondarily attributable to COPD or, if adjudication was lacking, those with COPD listed in any diagnosis field. In sensitivity analyses, the primary outcome was decomposed into COPD-related hospitalizations and COPD-related mortality. As another sensitivity analysis, the endpoint was restricted to incident hospitalizations and mortality



adjudicated or coded as having COPD as the primary/underlying cause. Each fixed-threshold definition for airflow obstruction was added separately to a base model adjusted for age at enrollment, sex, race, height, birth-year, site and cohort.

<sup>a</sup>The optimal fixed threshold was defined as the one that generated the highest Harrell's c-statistic.

<sup>b</sup>Formal statistical comparisons of c-statistics were performed using a nonparametric approach to compare two correlated c-statistics with right-censored survival outcomes.

<sup>c</sup>C-statistic for the optimal fixed threshold was not significantly different than the c-statistic for 0.70.

<sup>d</sup>C-statistic for the optimal fixed threshold was not significantly different than the c-statistic for LLN.

<sup>e</sup>The optimal fixed threshold was 0.70, hence  $C_{OPT} = C_{0.7}$

**eTable 6. Brier Scores (95% confidence intervals) for the prediction of COPD events by various FEV<sub>1</sub>/FVC thresholds in adjusted models.**

| Model                                                                 | At Risk / Events<br>(IDR) | Optimal fixed ratio<br>threshold <sup>a</sup> | Brier Scores                 |                              |                              |
|-----------------------------------------------------------------------|---------------------------|-----------------------------------------------|------------------------------|------------------------------|------------------------------|
|                                                                       |                           |                                               | B <sub>OPT</sub><br>(95% CI) | B <sub>0.7</sub><br>(95% CI) | B <sub>LLN</sub><br>(95% CI) |
| <b>Subgroup analyses</b>                                              |                           |                                               |                              |                              |                              |
| Never smoker                                                          | 8,989 / 523<br>(3.95)     | 0.70                                          | 0.059<br>(0.052, 0.065)      | n/a <sup>b</sup>             | 0.059<br>(0.052, 0.065)      |
| Ever smoker                                                           | 15,023 / 3,270<br>(15.76) | 0.67 <sup>c</sup>                             | 0.195<br>(0.186, 0.203)      | 0.197<br>(0.188, 0.205)      | 0.193<br>(0.185, 0.202)      |
| Men                                                                   | 11,114 / 2,048<br>(13.78) | 0.66 <sup>c</sup>                             | 0.467<br>(0.158, 0.176)      | 0.170<br>(0.161, 0.179)      | 0.166<br>(0.157, 0.175)      |
| Women                                                                 | 12,898 / 1,745<br>(9.13)  | 0.70                                          | 0.130<br>(0.123, 0.138)      | n/a <sup>b</sup>             | 0.130<br>(0.122, 0.137)      |
| <b>Alternative event definitions</b>                                  |                           |                                               |                              |                              |                              |
| COPD-related hospitalization                                          | 24,012 / 3,740<br>(11.00) | 0.70                                          | 0.148<br>(0.142, 0.154)      | n/a <sup>b</sup>             | 0.146<br>(0.141, 0.152)      |
| COPD-related mortality                                                | 24,012 / 425<br>(1.18)    | 0.66                                          | 0.153<br>(0.148, 0.158)      | 0.154<br>(0.149, 0.159)      | 0.153<br>(0.148, 0.158)      |
| Hospitalization or mortality with COPD as<br>primary/underlying cause | 24,012 / 1,114<br>(3.12)  | 0.67 <sup>c</sup>                             | 0.045<br>(0.042, 0.049)      | 0.046<br>(0.042, 0.049)      | 0.045<br>(0.041, 0.048)      |

B<sub>OPT</sub> = Brier Score for the optimal fixed threshold; B<sub>0.7</sub> = Brier Score for the model using a fixed ratio threshold of 0.70; B<sub>LLN</sub> = Brier Score for the model using the LLN ratio threshold; IDR = Incidence Density Rate per 1,000 person-years of follow-up; LLN = Lower limit of normal per Global Lung Function Initiative reference equations; n/a = not applicable.

Cox proportional hazards models were used. The primary outcome was defined as first hospitalization or death adjudicated as primarily or secondarily attributable to COPD or, if adjudication was lacking, those with COPD listed in any diagnosis field. In sensitivity analyses, the primary outcome was decomposed into COPD-related hospitalizations and COPD-related mortality. As another sensitivity analysis, the endpoint was restricted to incident hospitalizations and mortality adjudicated or coded as having COPD as the primary/underlying cause. Each fixed-threshold definition for airflow obstruction was added separately to a base model adjusted for age at enrollment, sex, race, height, birth-year, site and cohort.

<sup>a</sup>The optimal fixed threshold was defined as the one that generated the highest Harrell's c-statistic.

<sup>b</sup>The optimal fixed threshold was 0.70, hence B<sub>OPT</sub> = B<sub>0.7</sub>.

**eFigure 1. CONSORT**

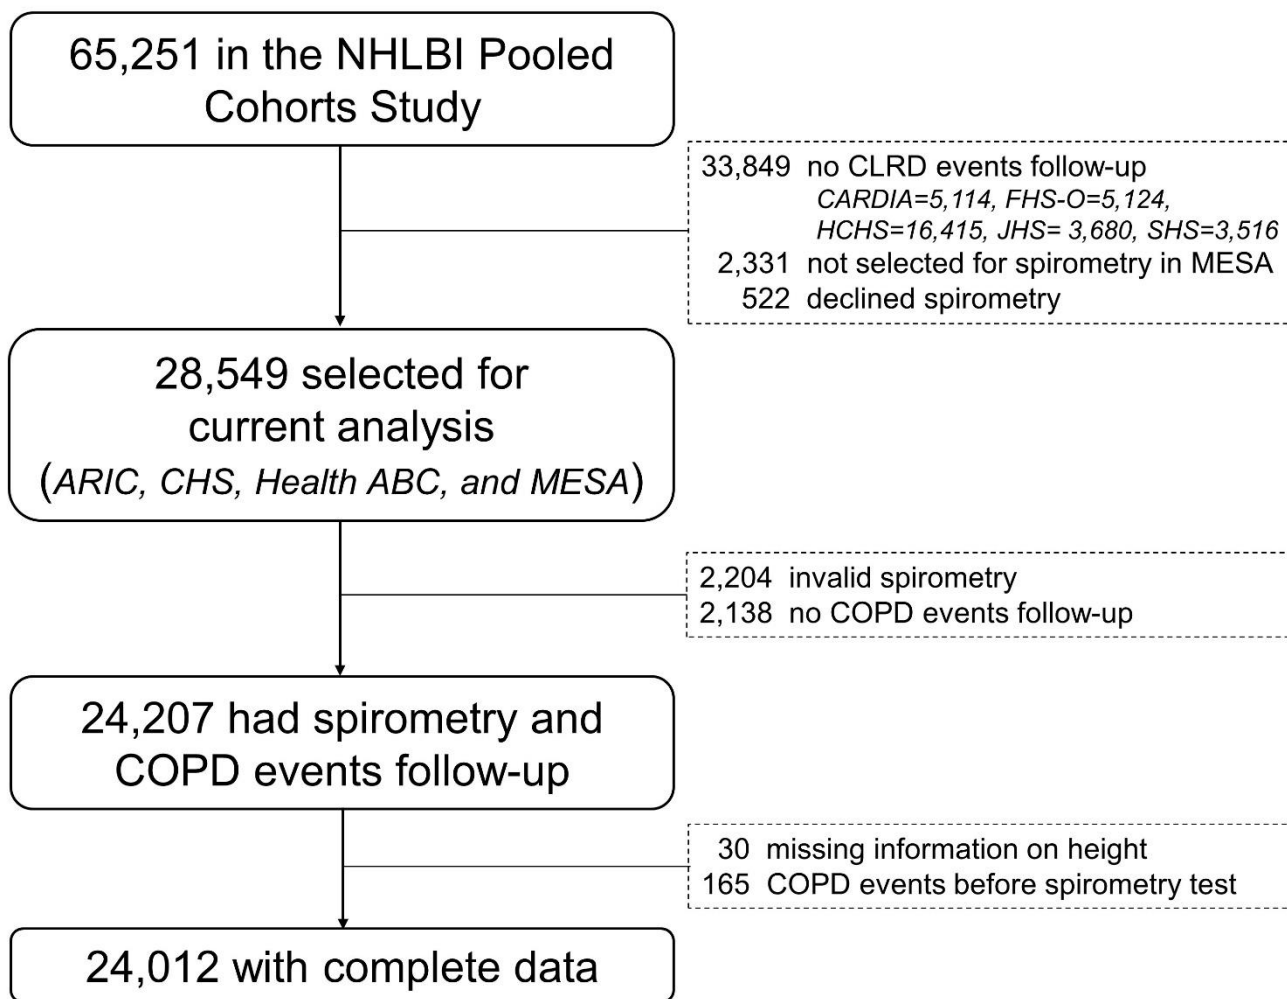

ARIC = Atherosclerosis Risk in Communities Study; CARDIA = Coronary artery Risk Development in Young Adults Study; CHS = Cardiovascular Health Study; HABC = Health Aging and Body Composition; FHS-O – Framingham Heart Study- Offspring cohort; HCHS = Hispanic Community Health Study; JHS = Jackson Heart Study; MESA = Multi-Ethnic Study of Atherosclerosis; SHS = Strong Heart Study.

**eFigure 2. Venn diagram showing the extent of overlap for several different FEV<sub>1</sub>/FVC threshold groups and, for each group, the incidence density rates (IDRs) per 1,000 person-years for COPD-related hospitalization and mortality.**

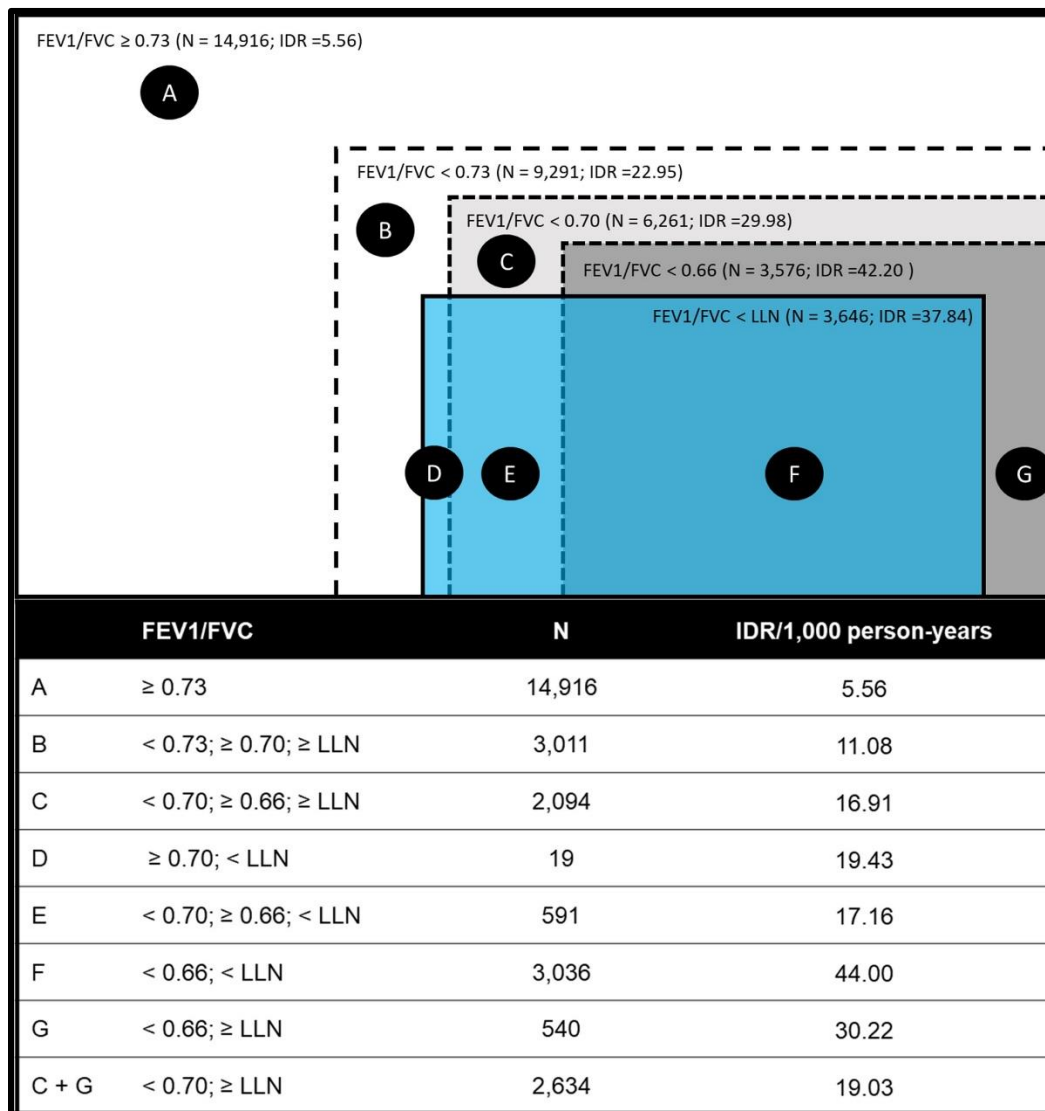

LLN = Lower limit of normal per Global Lung Function Initiative reference equations.

**eFigure 3. Calibration plot comparing predicted and observed 10-year risk for COPD-related events, by various FEV<sub>1</sub>/FVC stratum for airflow limitation, in covariate-adjusted models.**

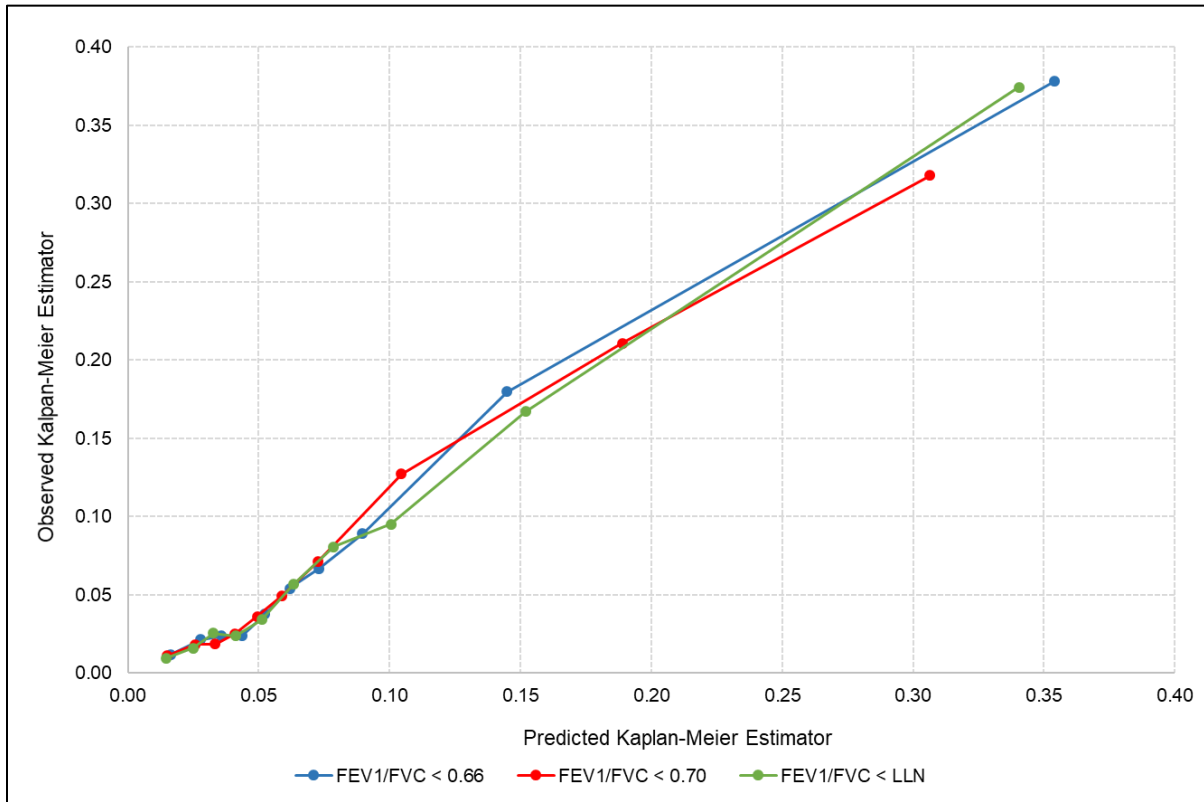

The 10-year risk for COPD-related events was estimated using Cox proportional hazards models. The models for FEV<sub>1</sub>/FVC < 0.70 and FEV<sub>1</sub>/FVC < 0.66 were adjusted for age at enrollment, sex, race/ethnicity, height, birth-year, site and cohort, while the model for LLN was adjusted only for birth-year, site and cohort.

**eFigure 4. Discriminative accuracy of various fixed FEV<sub>1</sub>/FVC thresholds for airflow obstruction with respect to COPD-related hospitalization and mortality, stratified by smoking status.**

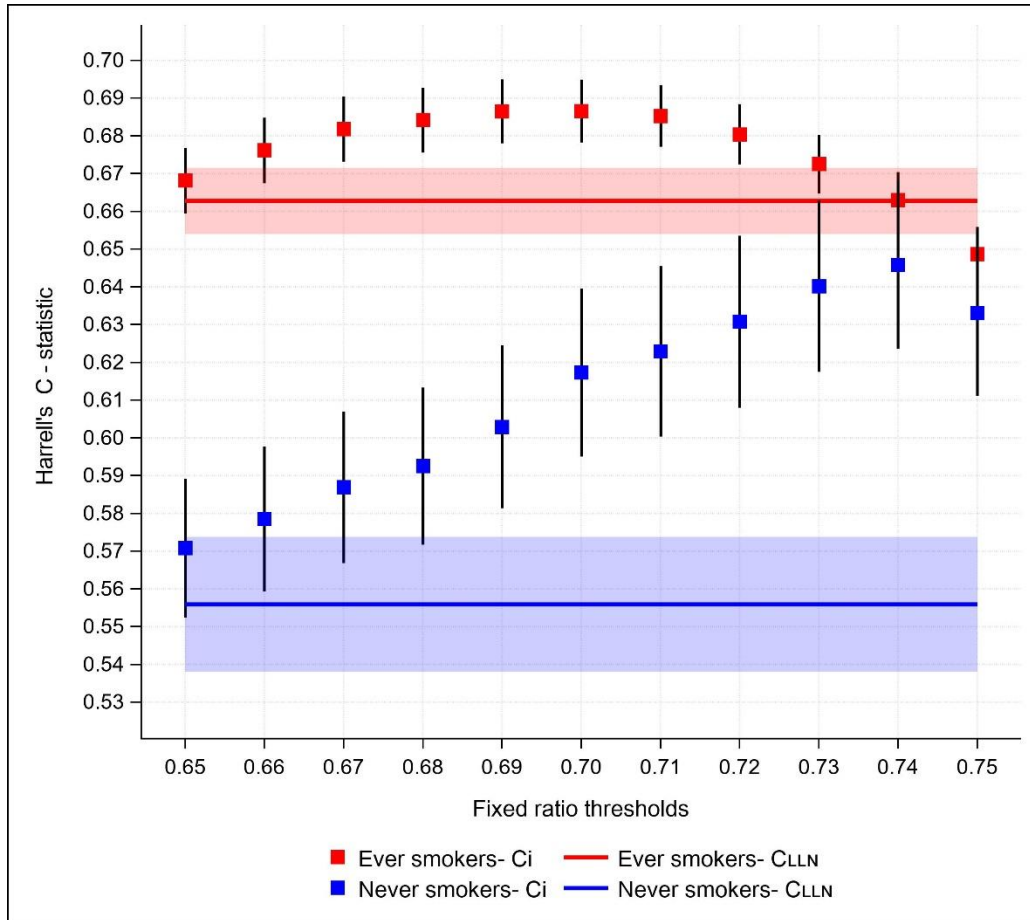

Optimal threshold based on highest C-statistic: ever smokers = 0.70; never smokers = 0.74

In ever smokers, C<sub>0.65</sub>, C<sub>0.66</sub>, C<sub>0.72</sub>, C<sub>0.73</sub>, C<sub>0.74</sub>, and C<sub>0.75</sub> were significantly different than C<sub>0.7</sub>; and all fixed-thresholds except for C<sub>0.74</sub> were significantly different than C<sub>LLN</sub> (p-values < 0.05).

In never smokers, all fixed-thresholds except for C<sub>0.71</sub>, C<sub>0.72</sub>, and C<sub>0.75</sub> were significantly different than C<sub>0.7</sub>; and all fixed-thresholds were significantly different than C<sub>LLN</sub> (p-values < 0.05).

C<sub>i</sub> = c-statistic for fixed threshold models. C<sub>LLN</sub> = c-statistic for the LLN threshold. CI = confidence interval; LLN = Lower limit of normal per Global Lung Function Initiative reference equations.

Solid lines indicate c-statistic for LLN definitions with 95% CI. Color filled squares indicate point estimates with 95% CI for c-statistic for fixed FEV<sub>1</sub>/FVC ratio thresholds.

A Cox proportional hazards model was used to generate the c-statistics in the figure each fixed-threshold definition for airflow limitation. Harrell's c-statistics were compared between each fixed-threshold and the c-statistic for ratio-threshold of 0.70 and LLN. Formal statistical comparisons of c-statistics were performed using a nonparametric approach to compare two correlated c-statistics with right-censored survival outcomes.

**eFigure 5. Discriminative accuracy of various fixed FEV<sub>1</sub>/FVC thresholds for airflow obstruction with respect to COPD-related hospitalization versus COPD-related mortality.**

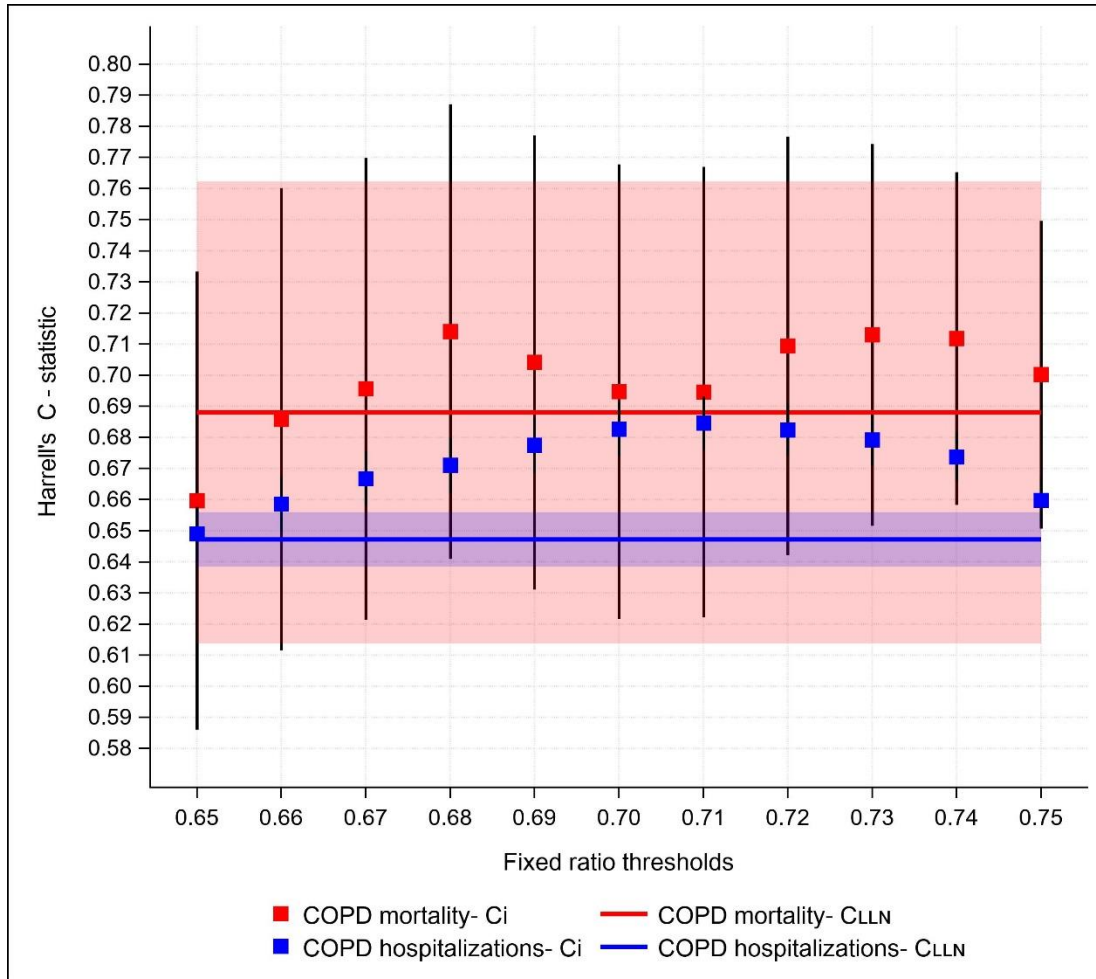

Optimal threshold based on highest C-statistic: COPD mortality = 0.68; COPD hospitalizations = 0.71

For COPD mortality, all fixed threshold except for  $C_{0.65}$ ,  $C_{0.66}$ ,  $C_{0.67}$ , and  $C_{0.72}$  were significantly different than  $C_{0.7}$  and; all fixed threshold except for  $C_{0.70}$ ,  $C_{0.71}$ ,  $C_{0.72}$ , and  $C_{0.73}$  were significantly different than  $C_{LLN}$  (p-values < 0.05).

For COPD hospitalizations, all fixed threshold except for  $C_{0.71}$ ,  $C_{0.72}$ , and  $C_{0.73}$  were significantly different than  $C_{0.7}$ ; and all fixed threshold except for  $C_{0.65}$  were significantly different than  $C_{LLN}$  (p-values < 0.05).

$C_i$  = c-statistic for fixed threshold models.  $C_{LLN}$  = c-statistic for the LLN threshold. CI = confidence interval; LLN = Lower limit of normal per Global Lung Function Initiative reference equations.

Solid lines indicate c-statistic for LLN definitions with 95% CI. Color filled squares indicate point estimates with 95% CI for c-statistic for fixed FEV<sub>1</sub>/FVC ratio thresholds.

A Cox proportional hazards model was used to generate the c-statistics in the figure each fixed-threshold definition for airflow limitation. Harrell's c-statistics were compared between each fixed-threshold and the c-statistic for ratio-threshold of 0.70 and LLN. Formal statistical comparisons of c-statistics were performed using a nonparametric approach to compare two correlated c-statistics with right-censored survival outcomes.

**eFigure 6. Discriminative accuracy of various fixed FEV<sub>1</sub>/FVC thresholds for airflow obstruction with respect to COPD-related hospitalization and mortality, stratified by sex.**

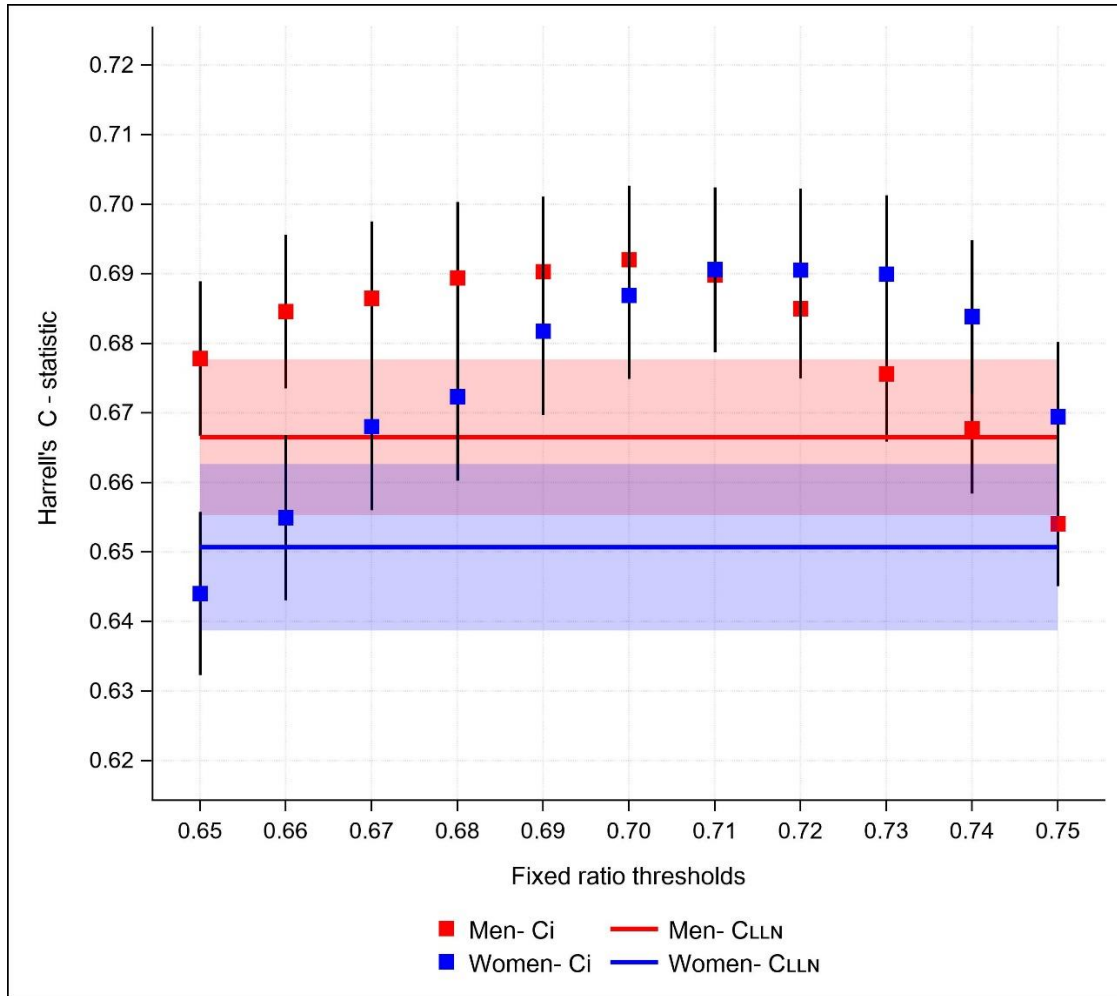

Optimal threshold based on highest C-statistic: men= 0.70; women = 0.71

In men,  $C_{0.65}$ ,  $C_{0.72}$ ,  $C_{0.73}$ ,  $C_{0.74}$  and  $C_{0.75}$  were significantly different than  $C_{0.7}$ ; all fixed-thresholds except for  $C_{0.73}$  and  $C_{0.74}$  were significantly different than  $C_{LLN}$  (p-values < 0.05).

In women, all ratio thresholds except for  $C_{0.70}$ ,  $C_{0.72}$ ,  $C_{0.73}$ , and  $C_{0.74}$  were significantly different than  $C_{0.7}$ ; and all ratio thresholds except for  $C_{0.66}$  were significantly different than  $C_{LLN}$  (p-values < 0.05).

$C_i$  = c-statistic for fixed threshold models.  $C_{LLN}$  = c-statistic for the LLN threshold. CI = confidence interval; LLN = Lower limit of normal per Global Lung Function Initiative reference equations.

Solid lines indicate c-statistic for LLN definitions with 95% CI. Color filled squares indicate point estimates with 95% CI for c-statistic for fixed FEV<sub>1</sub>/FVC ratio thresholds.

A Cox proportional hazards model was used to generate the c-statistics in the figure each fixed-threshold definition for airflow limitation. Harrell's c-statistics were compared between each fixed-threshold and the c-statistic for ratio-threshold of 0.70 and LLN. Formal statistical comparisons of c-statistics were performed using a nonparametric approach to compare two correlated c-statistics with right-censored survival outcomes.



**eFigure 7. Discriminative accuracy of various fixed FEV<sub>1</sub>/FVC thresholds for airflow obstruction with respect to events classified as primarily caused by COPD versus the primary endpoint.**

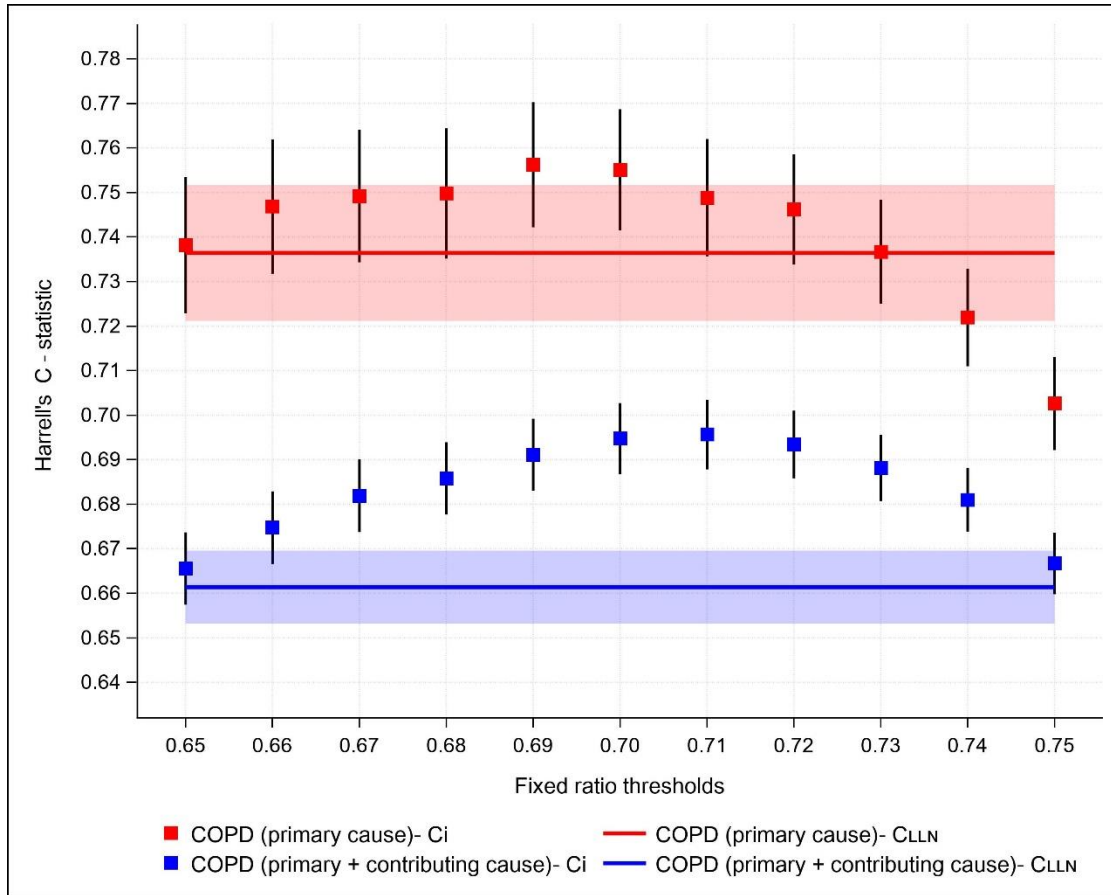

Optimal threshold based on highest C-statistic: COPD (primary cause) = 0.69; COPD (primary + contributing cause) = 0.71

For COPD (primary cause), all fixed threshold except for  $C_{0.66}$ ,  $C_{0.67}$ ,  $C_{0.68}$ , and  $C_{0.69}$  were significantly different than  $C_{0.7}$ ; and all fixed threshold except for  $C_{0.65}$ ,  $C_{0.72}$ , and  $C_{0.73}$  were significantly different than  $C_{LLN}$  (p-values < 0.05).

For COPD (primary + contributing cause), all fixed threshold except for  $C_{0.70}$  and  $C_{0.72}$  were significantly different than  $C_{0.7}$ ; and all fixed threshold except for  $C_{0.65}$  and  $C_{0.75}$  were significantly different than  $C_{LLN}$  (p-values < 0.05).

$C_i$  = c-statistic for fixed threshold models.  $C_{LLN}$  = c-statistic for the LLN threshold. CI = confidence interval; LLN = Lower limit of normal per Global Lung Function Initiative reference equations.

Solid lines indicate c-statistic for LLN definitions with 95% CI. Color filled squares indicate point estimates with 95% CI for c-statistic for fixed FEV<sub>1</sub>/FVC ratio thresholds.

A Cox proportional hazards model was used to generate the c-statistics in the figure each fixed-threshold definition for airflow limitation. Harrell's c-statistics were compared between each fixed-threshold and the c-statistic for ratio-threshold of 0.7 and LLN. Formal statistical comparisons of c-statistics were performed using a nonparametric approach to compare two correlated c-statistics with right-censored survival outcomes.

**eFigure 8. Incremental discriminative accuracy of various fixed FEV<sub>1</sub>/FVC thresholds for airflow obstruction with respect to COPD-related hospitalization and mortality, when added to a model adjusted for socio-demographic factors and smoking status.**

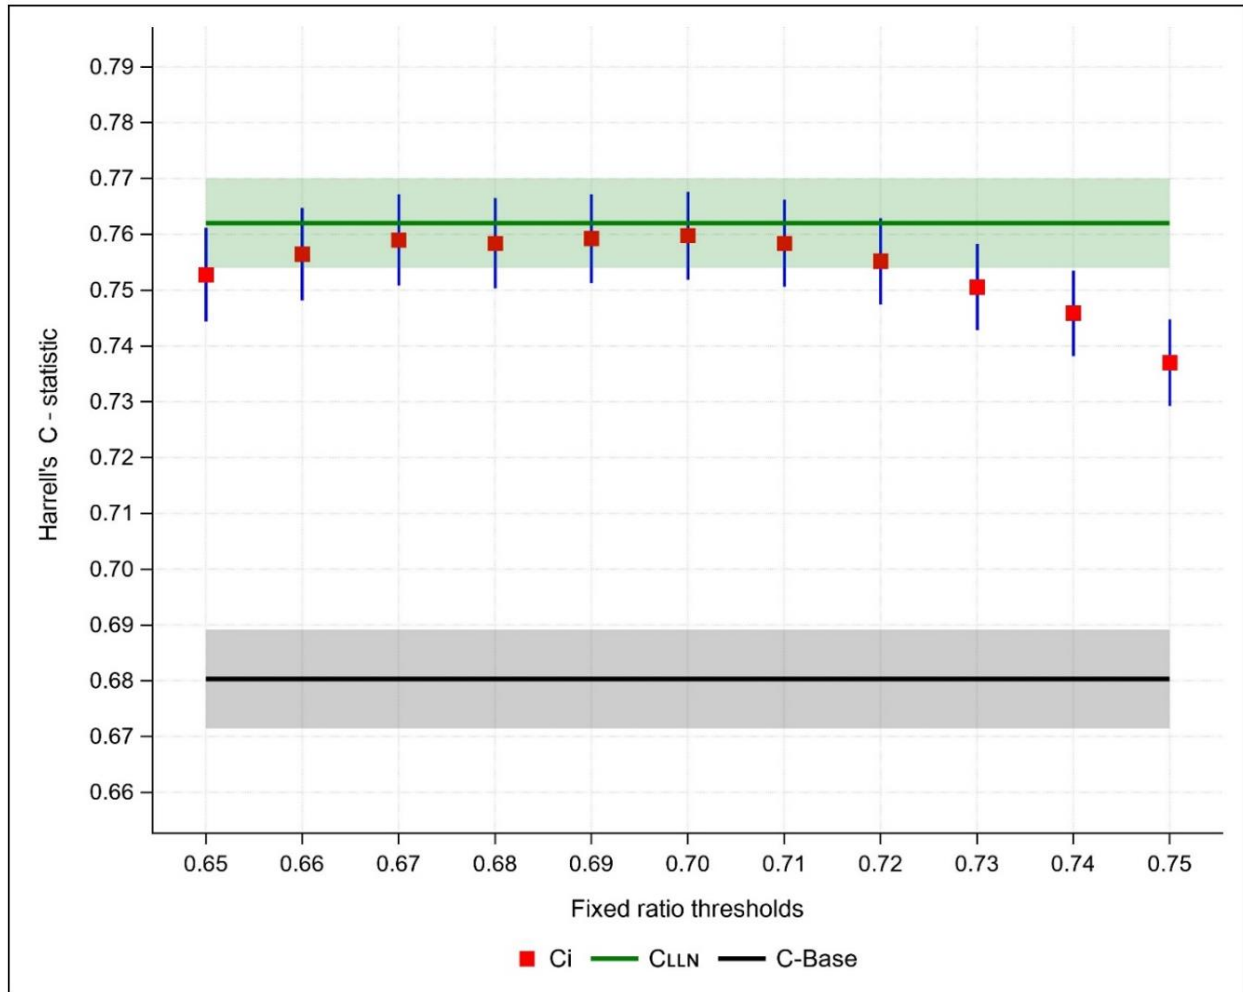

Optimal threshold based on highest C-statistic: adjusted model = 0.70; unadjusted model = 0.71

In adjusted models, all fixed threshold except for C<sub>0.66</sub>, C<sub>0.67</sub>, C<sub>0.68</sub>, C<sub>0.69</sub>, and C<sub>0.71</sub> were significantly different than C<sub>0.7</sub>, all fixed threshold except for C<sub>0.67</sub>, C<sub>0.69</sub>, C<sub>0.70</sub>, and C<sub>0.71</sub> were significantly different than C<sub>LLN</sub>.

In unadjusted models, all fixed threshold except for C<sub>0.70</sub> and C<sub>0.72</sub> were significantly different than C<sub>0.7</sub> and; all fixed threshold except for C<sub>0.65</sub> and C<sub>0.75</sub> were significantly different than C<sub>LLN</sub> (p-values < 0.05).

C<sub>i</sub> = c-statistic for fixed threshold models. C<sub>LLN</sub> = c-statistic for the LLN threshold. CI = confidence interval; LLN = Lower limit of normal per Global Lung Function Initiative reference equations.

Solid lines indicate c-statistic for LLN definitions with 95% CI. Color filled square indicates point estimates with 95% CI for c-statistic for fixed FEV<sub>1</sub>/FVC ratio thresholds.

A Cox proportional hazards model was used to generate the c-statistics from the unadjusted model for each fixed-threshold definition for airflow limitation. For the adjusted model, each fixed-threshold definition for airflow obstruction was added separately to a base model, which was a Cox proportional hazards model adjusted for age at

enrollment, sex, race, height, birth-year, site and cohort. The LLN definition was added separately to a base model excluding the components of the reference equation (age, sex, race/ethnicity, and height). Harrell's c-statistics were compared between each fixed-threshold and the c-statistic for ratio-threshold of 0.70 and LLN. Formal statistical comparisons of c-statistics were performed using a nonparametric approach to compare two correlated c-statistics with right-censored survival outcomes.

**eFigure 9. Incremental discrimination with sequential covariate adjustment to the fixed FEV<sub>1</sub>/FVC thresholds for airflow obstruction with respect to COPD-related hospitalization and mortality**

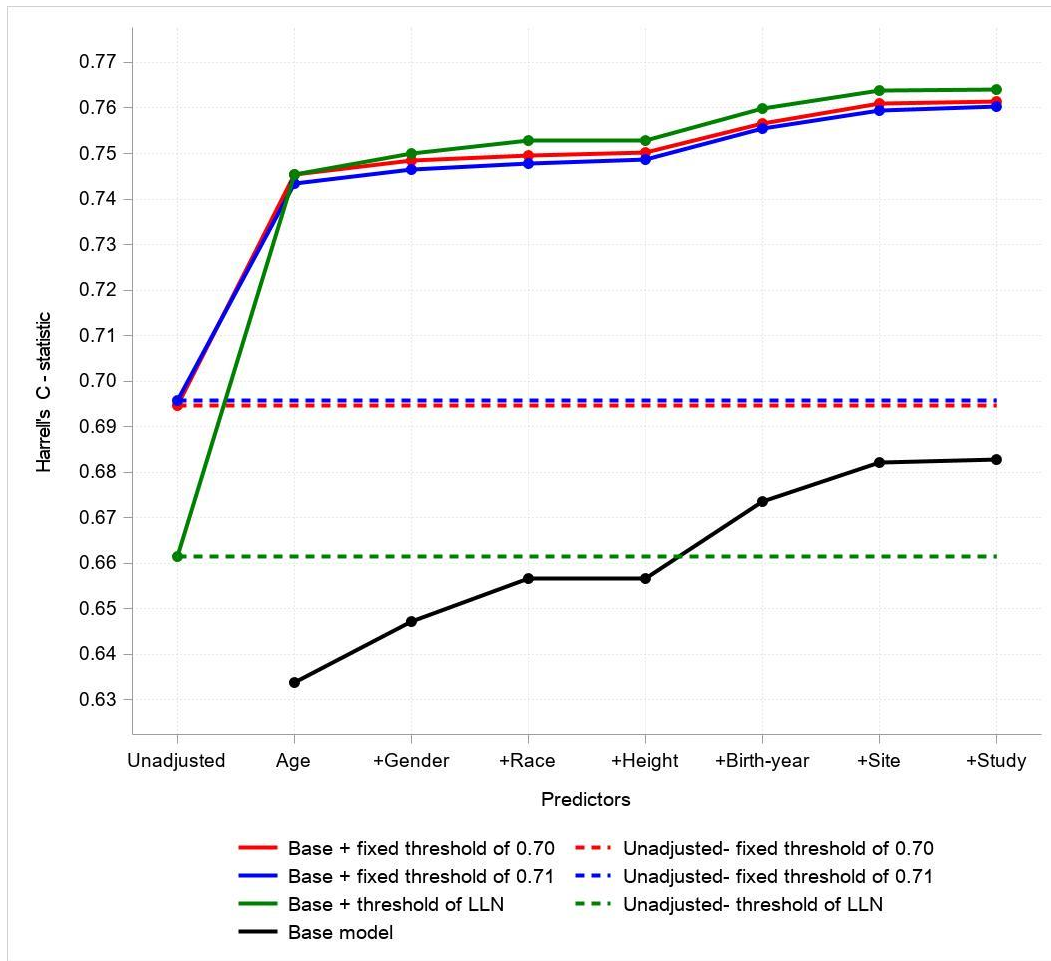

The Cox proportional hazards model was used to generate c-statistic for the base model including age as only predictor. Next, other predictors were sequentially added to the base model. The resultant C-statistics for the sequentially adjusted base models are shown by the solid black line).

Ratio thresholds were added to each of the sequentially-adjusted base models. The resultant C-statistics are shown for FEV<sub>1</sub>/FVC < 0.70 (solid red line), FEV<sub>1</sub>/FVC < 0.71 (solid blue line), and FEV<sub>1</sub>/FVC < LLN (solid green line). The distance between the solid black line and the solid colored lines reflects the incremental discrimination provided by the ratio thresholds.

For comparison, the C-statistics provided by the ratio thresholds without any covariate adjustment are shown for FEV<sub>1</sub>/FVC < 0.70 (dashed red line), FEV<sub>1</sub>/FVC < 0.71 (dashed blue line), and FEV<sub>1</sub>/FVC < LLN (dashed green line).

LLN = Lower limit of normal per Global Lung Function Initiative reference equations.
